# Supplementary material
Source: Springer Nature journal article supplement (https://www.springermedizin.de/resource/supplementary/13002_2011_236_MOESM1_ESM.pdf/9627446)

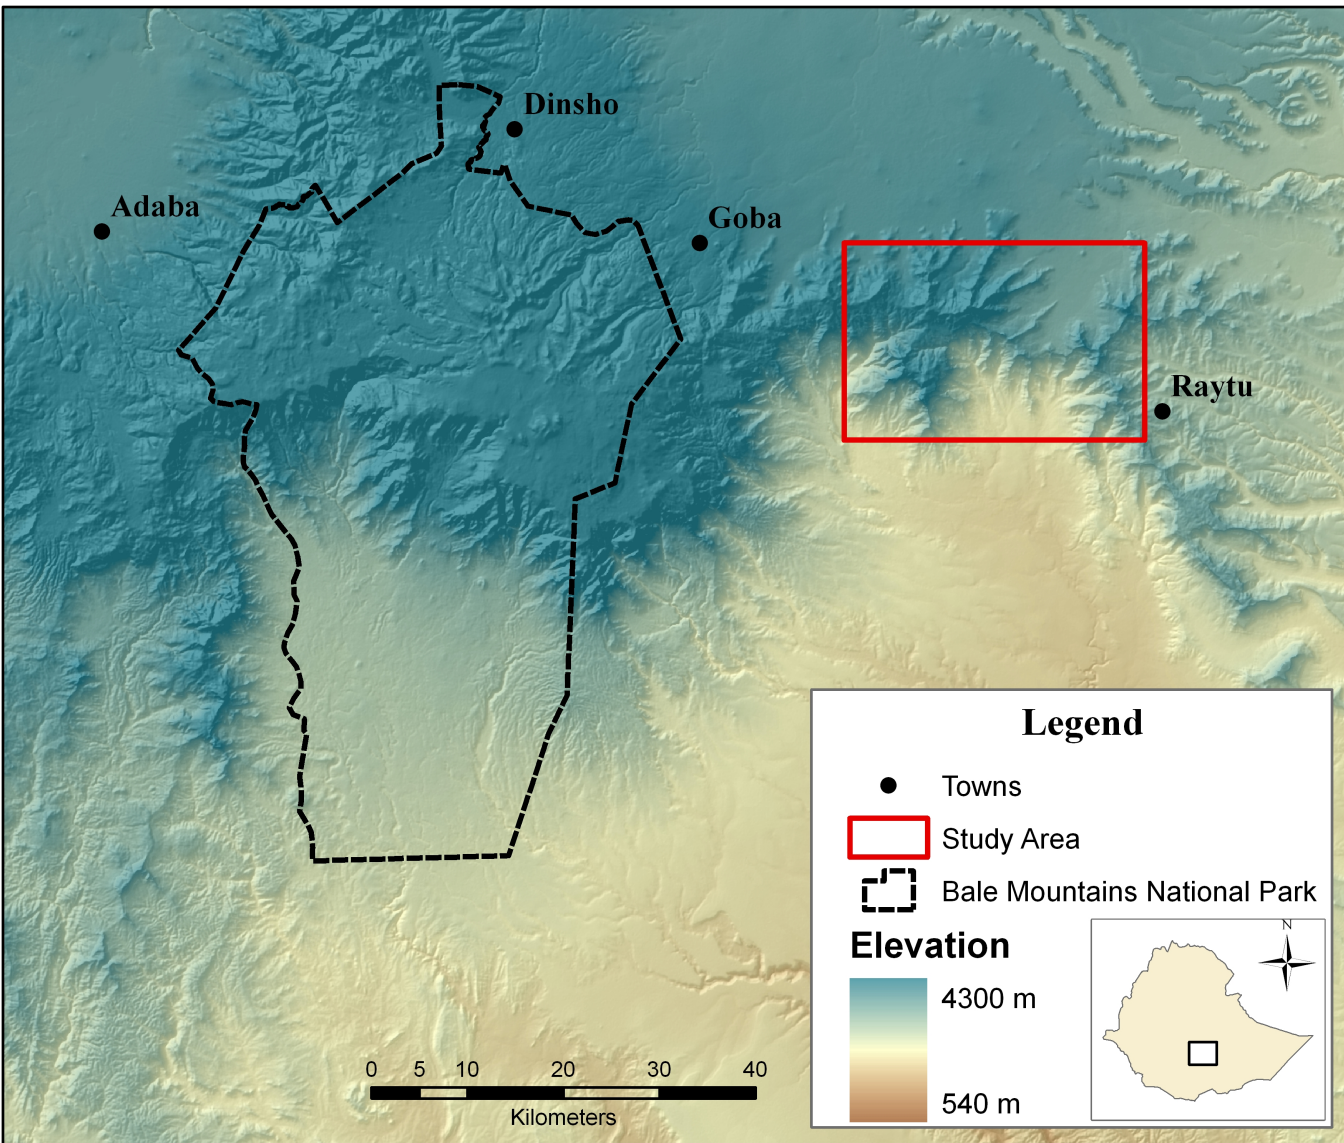

### Legend

● Towns

▭ Study Area

▭ Bale Mountains National Park

### Elevation

4300 m

540 m

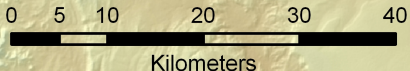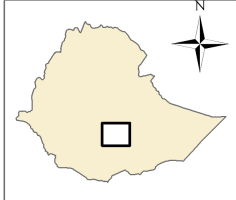

Supplement: MOESM1 [file 9627446]
